# Supplementary material
Source: publisher site journal article supplement (https://www.dovepress.com/article/581564)
Supplement: Supplementary file 1 [file 581564%20Supplementary%20Material.docx]

**Supplemental Table 1: Awareness of Artificial Intelligence (AI) in Healthcare.** Participants’ awareness of AI in healthcare is stratified by gender, age, race/ethnicity, and residential neighborhood Area Deprivation Index (ADI).

|  | **Total N (%)** | **Aware of AI** | **AI in health care** | **AI in diagnosis*** | **AI in eye disease diagnosis**** |
| --- | --- | --- | --- | --- | --- |
| **Gender** |  |  |  |  |  |
| Female | 52 (52%) | 35 (67%) | 34 (65%) | 34 (65%) | 21 (40%) |
| Male | 48 (48%) | 43 (90%) | 36 (75%) | 37 (77%) | 25 (52%) |
| **Age (years)** |  |  |  |  |  |
| Under 45 | 16 (16%) | 13 (81%) | 11 (69%) | 11 (69%) | 9 (56%) |
| ≥ 45 to < 64 | 41 (41%) | 28 (68%) | 30 (73%) | 33 (81%) | 22 (54%) |
| > 65 | 43 (43%) | 37 (86%) | 29 (67%) | 27 (63%) | 15 (35%) |
| **Race/Ethnicity** |  |  |  |  |  |
| Hispanic | 24 (24%) | 13 (54%) | 20 (83%) | 23 (96%) | 17 (71%) |
| Non-Hispanic Black | 20 (20%) | 17 (85%) | 9 (45%) | 12 (60%) | 5 (25%) |
| Non-Hispanic White | 31 (31%) | 28 (90%) | 21 (68%) | 17 (55%) | 10 (32%) |
| Other | 25 (25%) | 20 (80%) | 20 (80%) | 19 (76%) | 14 (56%) |
| **Area Deprivation Index***** |  |  |  |  |  |
| Quartile 1 | 18 (19%) | 15 (83%) | 13 (72%) | 10 (56%) | 6 (33%) |
| Quartile 2 | 51 (53%) | 39 (77%) | 36 (71%) | 40 (78%) | 26 (51%) |
| Quartile 3 | 18 (19%) | 14 (78%) | 11 (61%) | 14 (78%) | 8 (44%) |
| Quartile 4 | 10 (10%) | 8 (80%) | 7 (70%) | 5 (50%) | 4 (40%) |

*One participant did not respond

**Three participants did not respond

***ADI unavailable for three patients

**Supplemental Table 2: Trust in Artificial Intelligence (AI) Systems.** Participants’ trust of AI systems, stratified by gender, age, race/ethnicity, and residential neighborhood Area Deprivation Index (ADI).

|  | **Total N (%)** | **Worried AI will make doctors lazy*** | **Trust AI if supervised by doctor** | **AI will keep my information confidential*** | **AI improves accuracy and human errors** | **Comfortable with AI in eye exams*** | **Trust results of AI as much as providers’** |
| --- | --- | --- | --- | --- | --- | --- | --- |
| **Gender** |  |  |  |  |  |  |  |
| Female | 52 (52%) | 15 (29%) | 47 (90%) | 39 (76%) | 37 (71%) | 40 (78%) | 27 (52%) |
| Male | 48 (48%) | 18 (38%) | 36 (75%) | 37 (77%) | 40 (83%) | 42 (88%) | 24 (50%) |
| **Age (years)** |  |  |  |  |  |  |  |
| Under 45 | 16 (16%) | 7 (44%) | 13 (81%) | 14 (93%) | 15 (94%) | 13 (81%) | 7 (44%) |
| ≥ 45 to < 64 | 41 (41%) | 13 (32%) | 36 (88%) | 30 (73%) | 32 (78%) | 31 (76%) | 22 (54%) |
| > 65 | 43 (43%) | 13 (31%) | 34 (79%) | 32 (74%) | 30 (70%) | 38 (90%) | 22 (51%) |
| **Race/Ethnicity** |  |  |  |  |  |  |  |
| Hispanic | 24 (24%) | 11 (46%) | 21 (88%) | 21 (91%) | 23 (96%) | 24 (100%) | 18 (75%) |
| Non-Hispanic Black | 20 (20%) | 5 (25%) | 16 (80%) | 11 (55%) | 10 (50%) | 16 (80%) | 5 (25%) |
| Non-Hispanic White | 31 (31%) | 8 (26%) | 24 (77%) | 25 (81%) | 26 (84%) | 27 (87%) | 14 (45%) |
| Other | 25 (25%) | 9 (38%) | 22 (88%) | 18 (72%) | 18 (72%) | 15 (63%) | 14 (56%) |
| **Area Deprivation Index**** |  |  |  |  |  |  |  |
| Quartile 1 | 18 (19%) | 4 (24%) | 14 (78%) | 14 (78%) | 12 (67%) | 16 (94%) | 6 (33%) |
| Quartile 2 | 51 (53%) | 22 (44%) | 46 (90%) | 39 (78%) | 40 (78%) | 42 (82%) | 25 (49%) |
| Quartile 3 | 18 (19%) | 6 (33%) | 13 (72%) | 14 (78%) | 12 (67%) | 14 (78%) | 11 (61%) |
| Quartile 4 | 10 (10%) | 1 (10%) | 8 (80%) | 7 (70%) | 10 (100%) | 9 (90%) | 8 (80%) |

*One participant did not respond

**ADI unavailable for three patients

**Supplemental Table 3: Efficiency of Artificial Intelligence (AI).** Participants’ perception of efficiency of AI in healthcare, stratified by gender, age, race and residential neighborhood Area Deprivation Index (ADI).

|  | **Total N (%)** | **Errors by computers are more harmful** | **Earlier results are preferred** |
| --- | --- | --- | --- |
| **Gender** |  |  |  |
| Female | 52 (52%) | 26 (50%) | 30 (58%) |
| Male | 48 (48%) | 19 (39%) | 31 (64%) |
| **Age (years)** |  |  |  |
| Under 45 | 16 (16%) | 10 (62%) | 9 (56%) |
| ≥ 45 to < 64 | 41 (41%) | 21 (51%) | 24 (58%) |
| > 65 | 43 (43%) | 14 (33%) | 28 (65%) |
| **Race/Ethnicity** |  |  |  |
| Hispanic | 24 (24%) | 12 (50%) | 19 (79%) |
| Non-Hispanic Black | 20 (20%) | 9 (45%) | 9 (45%) |
| Non-Hispanic White | 31 (31%) | 13 (42%) | 20 (64%) |
| Other | 25 (25%) | 11 (44%) | 13 (52%) |
| **Area Deprivation Index*** |  |  |  |
| Quartile 1 | 18 (19%) | 4 (22%) | 11 (61%) |
| Quartile 2 | 51 (53%) | 24 (47%) | 33 (65%) |
| Quartile 3 | 18 (19%) | 11 (61%) | 10 (55%) |
| Quartile 4 | 10 (10%) | 5 (50%) | 6 (60%) |

*ADI unavailable for three patients

**Supplemental Table 4: Personal Interaction with Doctors.** Participants’ preference for interaction with doctors, stratified by gender, age, race and residential neighborhood Area Deprivation Index (ADI).

|  | **Total N (%)** | **More time with doctor with AI use*** | **Prefer human-led screening over AI*** | **Humans always responsible for diagnosis** |
| --- | --- | --- | --- | --- |
| **Gender** |  |  |  |  |
| Female | 52 (52%) | 38 (73%) | 35 (67%) | 50 (96%) |
| Male | 48 (48%) | 31 (64%) | 28 (60%) | 44 (92%) |
| **Age (years)** |  |  |  |  |
| Under 45 | 16 (16%) | 9 (56%) | 11 (69%) | 16 (100%) |
| ≥ 45 to < 64 | 41 (41%) | 32 (76%) | 26 (65%) | 37 (90%) |
| > 65 | 43 (43%) | 28 (65%) | 26 (61%) | 41 (95%) |
| **Race/Ethnicity** |  |  |  |  |
| Hispanic | 24 (24%) | 18 (75%) | 14 (61%) | 23 (96%) |
| Non-Hispanic Black | 20 (20%) | 13 (65%) | 13 (65%) | 18 (90%) |
| Non-Hispanic White | 31 (31%) | 20 (67%) | 19 (61%) | 29 (94%) |
| Other | 25 (25%) | 17 (68%) | 17 (68%) | 24 (96%) |
| **Area Deprivation Index**** |  |  |  |  |
| Quartile 1 | 18 (19%) | 12 (67%) | 8 (44%) | 18 (100%) |
| Quartile 2 | 51 (53%) | 40 (78%) | 36 (71%) | 48 (94%) |
| Quartile 3 | 18 (19%) | 8 (44%) | 9 (50%) | 16 (89%) |
| Quartile 4 | 10 (10%) | 6 (56%) | 8 (89%) | 9 (90%) |

*One participant did not respond

**ADI unavailable for three patients

**Supplemental Table 5: Overall Receptivity of Artificial Intelligence (AI) in Healthcare.** Participants’ receptivity to AI, stratified by age, gender, race, and residential neighborhood Area Deprivation Index (ADI).

|  | **Total N (%)** | **Satisfied with AI screening** | **More time with doctor with AI use** | **More comfortable with AI after this study** |
| --- | --- | --- | --- | --- |
| **Gender** |  |  |  |  |
| Female | 52 (52%) | 46 (88%) | 16 (31%) | 38 (73%) |
| Male | 48 (48%) | 46 (96%) | 15 (31%) | 38 (79%) |
| **Age (years)** |  |  |  |  |
| Under 45 | 16 (16%) | 14 (88%) | 8 (50%) | 14 (88%) |
| ≥ 45 to < 64 | 41 (41%) | 38 (93%) | 12 (29%) | 32 (76%) |
| > 65 | 43 (43%) | 40 (93%) | 11 (26%) | 31 (72%) |
| **Race/Ethnicity** |  |  |  |  |
| Hispanic | 24 (24%) | 23 (96%) | 13 (54%) | 23 (92%) |
| Non-Hispanic Black | 20 (20%) | 18 (90%) | 3 (15%) | 12 (60%) |
| Non-Hispanic White | 31 (31%) | 28 (90%) | 7 (23%) | 24 (77%) |
| Other | 25 (25%) | 23 (92%) | 8 (32%) | 18 (72%) |
| **Area Deprivation Index*** |  |  |  |  |
| Quartile 1 | 18 (19%) | 15 (83%) | 6 (33%) | 13 (72%) |
| Quartile 2 | 51 (53%) | 48 (94%) | 19 (37%) | 41 (80%) |
| Quartile 3 | 18 (19%) | 16 (89%) | 4 (22%) | 13 (72%) |
| Quartile 4 | 10 (10%) | 10 (100%) | 2 (20%) | 7 (70%) |

*ADI unavailable for three patients

**Supplemental Material**

Handheld Fundus Camera Acceptability Survey*

**Awareness of AI in Healthcare.**

1. Are you aware of what AI is? (Yes/No)
2. Have you heard of AI being implemented in healthcare? (Yes/No)
3. Were you aware that AI could be used in the process of making a diagnosis? (Yes/No)
4. Are you aware of AI application in diagnosing eye diseases? (Yes/No)

**Trust in AI Systems**

1. I am worried because AI may make doctors more lazy and less attentive. (Agree/Disagree/Neither Agree nor Disagree)
2. I trust AI more if it is supervised by a doctor. (Agree/Disagree/Neither Agree nor Disagree)
3. I trust that my personal information will be confident with AI-assisted screening. (Agree/Disagree/Neither Agree nor Disagree)
4. I am confident that AI can improve accuracy and minimize human errors such as discrimination. (Agree/Disagree/Neither Agree nor Disagree)
5. I would be comfortable if there is the use of AI in eye exams. (Agree/Disagree/Neither Agree nor Disagree)
6. I trust the results delivered by the AI-assisted eye exam as much as that of a trained health professional. (Agree/Disagree/Neither Agree nor Disagree)

**Efficiency of AI**

1. I believe that errors caused by computers are more harmful than errors caused by humans. (Agree/Disagree/Neither Agree nor Disagree)
2. The sooner I get the results, even if this is generated by a computer, the more I am at ease. (Agree/Disagree/Neither Agree nor Disagree)

**Personal Interaction with Doctors**

1. I think that if AI makes the diagnosis, I can spend more consultation time with the doctor. (Agree/Disagree/Neither Agree nor Disagree)
2. I would rather stick to the previous human-led screening program, even if that means a longer waiting time for results. (Agree/Disagree/Neither Agree nor Disagree)
3. Even when AI is used to evaluate scans, humans always remain responsible for the diagnosis. (Agree/Disagree/Neither Agree nor Disagree)

**Overall Receptivity of AI in Healthcare**

1. Are you satisfied with AI-based retina screening? (Yes/No)
2. Do you think AI-based retina screening can replace a doctor visit for routine screening? (Yes/No)
3. After doing this survey I now feel more comfortable with AI being used as part of the eye exam. (Agree/Disagree/Neither Agree nor Disagree)

**Explanation given to participants who were unaware of AI: “a computer analyzing your images or data to suggest a diagnosis or next step in management”*
